# Supplementary material for: RNA-seq–based mapping and candidate identification of mutations from forward genetic screens
Source: HighWire-hosted journal article supplement (doi:10.1101/gr.147322.112), 2013-01-08
Supplement: Supp_Table1.docx [file Supp_Table1.docx]

| ***hoxb1bb1219*** | 80 embryos | | | | | 40 embryos | | | | | 20 embryos | | | | |
| --- | --- | --- | --- | --- | --- | --- | --- | --- | --- | --- | --- | --- | --- | --- | --- |
| # 50bp WT reads >Q30 [million] | 35.4 | 16.0 | 8.1 | 3.7 | 2.1 | 41.5 | 20.1 | 10.1 | 4.8 | 2.4 | 48.5 | 19.8 | 9.6 | 4.6 | 2.6 |
| # 50bp MUT reads >Q30 [million] | 38.1 | 17.4 | 8.9 | 4.1 | 2.2 | 36.0 | 17.5 | 8.8 | 4.2 | 2.1 | 46.7 | 17.6 | 8.6 | 4.1 | 2.3 |
| **Mapping** | . |  |  |  |  |  |  |  |  |  |  |  |  |  |  |
| # Markers (>25x/25%) (thousand)1,4 | 27.9 | 9.8 | 3.7 | 1.4 | 0.8 | 34.0 | 13.1 | 5.0 | 1.9 | 0.9 | 40.2 | 11.2 | 4.1 | 1.6 | 0.8 |
| Homozygous linked (Mb)2,4 | 6.5 | none | none | none | none | 7.9 | none | none | none | none | 11.6 | none | none | none | none |
| Non homozygous linked (Mb)3,4 | 6.5 | 3.1 | 36.3 | chrom | chrom | 7.9 | 7.0 | 34.5 | 36.3 | chrom | 11.6 | 8.9 | 46 | chrom | chrom |
| Average marker freq. linked chr | 0.83 | 0.82 | 0.83 | 0.80 | 0.78 | 0.85 | 0.84 | 0.88 | 0.86 | 0.84 | 0.84 | 0.82 | 0.81 | 0.75 | 0.72 |
| Average marker freq. unlinked chrs | 0.65 | 0.65 | 0.65 | 0.65 | 0.65 | 0.65 | 0.65 | 0.66 | 0.66 | 0.66 | 0.66 | 0.66 | 0.65 | 0.65 | 0.65 |
| Coverage of hoxb1b mutation | 8 | 1 | 1 | 1 | 0 | 11 | 6 | 1 | 0 | 0 | 9 | 3 | 1 | 0 | 0 |
