# Supplementary material for: RNA-seq–based mapping and candidate identification of mutations from forward genetic screens
Source: HighWire-hosted journal article supplement (doi:10.1101/gr.147322.112), 2013-01-08
Supplement: SuppLegends.docx [file SuppLegends.docx]

Supplementary Figure 1. Strategy for RNA-seq-based mutation mapping. A. Individual heterozygous (+ / -) carriers are crossed. Gray bars represent homologous chromosomes linked to the mutation. The chromosome carrying the causal mutation (red asterisk/bar) is colored light gray, the wildtype chromosome is dark gray. B. RNA is extracted separately from wildtype and mutant sibling pools. In the wildtype pool, homologous chromosomes are independently inherited. In the mutant pool the causal mutation and the chromosomal region linked to it (light gray, SNP2) are homozygous while meiotic recombination makes unlinked regions heterozygous (SNP1). C. Homologous chromosome pairs are distinguished based on SNPs. Aligned reads that are the same as reference are represented as grey bars, while SNPs are colored letters. The wildtype pool is used to identify SNP markers useful for mapping (SNP1, SNP2). The mutant pool is subsequently assayed at the WT marker positions and SNP frequency is assessed. D. The frequency of identified markers in the mutant pool is plotted against chromosomal position (green discs). Regions of linkage (red box) are expected to approach homozygosity, i.e. an allele frequency of 1.0.

Supplemental Figure 2. Bioinformatics pipeline. Boxed text represents data in a particular format (type labeled in parentheses). Arrows and text represent tools to convert/analyze particular data. Blue, green, and red boxes represent steps in which important data is generated pertinent to the mapping experiment or identification of candidate mutations. The overall workflow can be accomplished in a unix/linux environment using the listed programs and scripts. Alternatively the pipeline can be run using the Galaxy package. All information for running the pipeline can be found at www.RNAmapper.org.

Supplemental Figure 3. RNA-seq-based mapping can tolerate limited wildtype sequence contamination. A. Genome-wide mapping data from 40-embryo, *hoxb1bb1219* experiments with increasing percentages of contaminating wildtype sequence. Specified amount of wildtype sibling sequence was randomly sampled and added to the mutant sequence data. This new contaminated mutant data was then subjected to the mapping pipeline. The average frequency of mutant markers (black marks) is plotted against genomic position. The known linkage location (arrows) was the highest peak identified in all experiments with up to 30% contaminating wildtype sequence; greater than 30% resulted in unlinked chromosomes having peak frequencies of equal value to the linked chromosome obscuring the correct map location (data not shown). Each Y-axis is the same as in the first row. B. Detail of the known linked chromosome. Each shape represents the average frequency plotted against chromosomal position from a given contamination experiment. A red line marks the position of the known mutation. Each tick mark on the X-axis represents 10Mb.

Supplemental Figure 4. RNA-seq-based mapping of unknown mutations identifies single peaks of linkage in each experiment. A-B. Rows represent individual experiments and are labeled by the number of mutant embryos used for mapping. A. Genome wide mapping data. The average frequency of mutant markers (black marks) is plotted against genomic position. In each case a single region emerges with an allele frequency near 1 (red arrows). Differences in marker density (line “thickness”) are due to the strain background carrying each mutation. Mut1-2 were generated and maintained in the *AB background and ~40,000 mapping markers were identified for each experiment, similar to those in Fig.1. By contrast, Mut3-5 were generated in *AB and outcrossed to WIK and contain ~90,000 mapping markers per experiment. Each chromosome is separated by vertical lines and labeled at the bottom. B. Detail of the chromosome containing the linked interval for a given experiment (row). The average frequency of mutant markers (green discs) is plotted against chromosomal position. A red box marks each region of linkage. Each tick mark on the X-axis represents 10Mb. Each Y-axis is the same as in A, row1.

Supplemental Figure 5. Comparison of linked regions from RNA-Seq- and WGS-based mapping approaches. Each bar represents the published linkage size from an individual mapping experiment. RNA-Seq-based mapping results in similarly sized linkage regions when compared to WGS-based methods. Variability in size of linked region given the same number of embryos is likely due to heterogeneity of meiotic recombination rates across the genome.

Supplemental Figure 6. Decreasing the number of RNA-seq reads reduces mapping quality. A-B. Rows represent individual experiments from 80-embryo *hoxb1bb1219* and are labeled by the number of reads used for mapping. A. Genome-wide mapping data with the specified number of reads randomly sampled from both wildtype and mutant datasets. These were then subjected to the mapping pipeline. The average frequency of mutant markers (black marks) is plotted against genomic position. Each chromosome is separated by vertical lines and labeled at the bottom. B. Detail of the chromosome containing the linked interval for a given experiment (row). The average frequency of mutant markers (green discs) is plotted against chromosomal position. Mapping with fewer than 20 million reads per sample fails to provide fine-scale mapping information although does reveals an elevated overall average marker frequency on the known linked chromosome as compared to unlinked chromosomes (see Supp.Table.1). A red line marks the position of the *hoxb1bb1219* mutation. Each tick mark on the X-axis represents 10Mb. Each Y-axis is the same as in A, row1.

Supplementary Table 1. Characteristics of reducing the number of reads on RNA-seq-based mapping. 1 >25 fold coverage at SNP with >25% heterozygosity. 2 Region defined as having an average marker frequency within 1% of homozygosity. 3 Region defined as having an average marker frequency within 1% of peak marker frequency. 4 Values from mutant RNA-seq data within the linked region. none - no region of homozygosity is present. chrom - linkage to the whole chromosome based on elevated average marker frequency but no fine-scale mapping information.
